# Supplementary figures and images for: Quick Detection of Field-Scale Soil Comprehensive Attributes via the Integration of UAV and Sentinel-2B Remote Sensing Data
Source: MDPI journal article supplement (doi:10.3390/rs13224716), 2021-11-22

**Supplementary Materials:** Figure S1: Results of the Parallel Analysis.

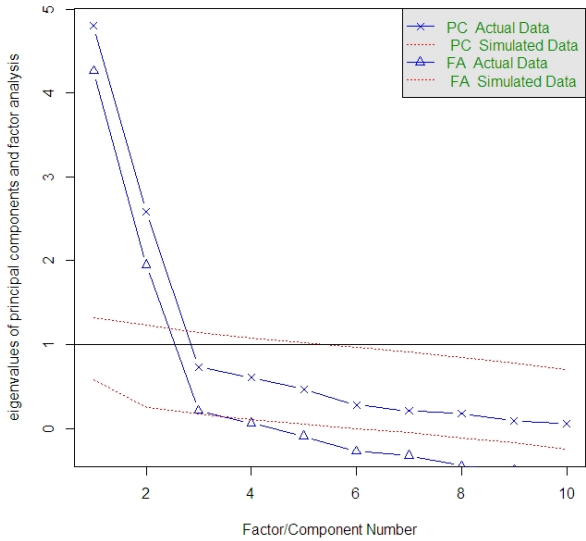

Supplement: s1 [file s1]
